# Supplementary material
Source: Royal Society of Chemistry journal article supplement (https://www.rsc.org/suppdata/p2/1998/219/g707701.doc)
Supplement: Supplementary file 1 [file g707701.doc]

**SUPPLEMENTARY INFORMATION**

**Tables of Raw Kinetic Data**

**Table 6**. Competition Data for the Reaction of 2-Fluoro-6-bromo-1-hexene (**1b**) with

Bu3GeHa at 30 oC.

a. The samples were photolyzed for 1 hr to avoid the addition of radicals Bu3Ge. to the double bond of the precursor. b. The ratios of reduced product to cyclized product were determined by integration of the CH2 =CF-CF resonance of **3b** (at  -95.13) versus the *t*-C-F resonance of **5b** ( -134.7) in the 19F NMR.

*k*H/*k*C5 = 3.64 0.09

*k*c5 = 2.7 ( 0.6) x 104 s-1

**Table 7.** Competition Data for the Reaction of 1-Fluoro-6-bromo-1-hexene (**1c**) with

Bu3SnHa at 30 oC.

a, The samples were photolyzed for 28 hr with Rayonet lamps. b The ratios of reduced product to cyclized product were determined by integration of the CHF =CH resonance (at  -130.34 and -130.92, *cis* and *trans* isomers of **3c**) versus the CH2F resonance of **5c** ( -215.9) in the 19F NMR.

*k*H / *k*c5 = 14.1  0.5

*k*c5 = 1.9 ( 0.5) x 105 s-1

**Table 8.** Competition Data for the Reaction of 1,1-Difluoro-6-bromo-1-hexene (**1d**) with

Bu3SnHa at 30 oC.

a, The samples were photolyzed under ambient light for 14 hr since the Rayonet lamps would cause the addition of radical Bu3Sn. to the double bond of the precursor. b, The ratios of reduced product to cyclized product were determined by integration of the CF2 =CH resonance (at  -90.41 and -92.83) for **3d** versus the CF2H resonance ( -119.44) for **5d** in the 19F NMR.

*k*H /*k*c5 = 11.7  0.3.

*k*c5 = 2.3 ( 0.2) x 105 s-1

**Table 9.** Competition Data for the Reaction of 1,2-Difluoro-6-bromo-1-hexene (**1e**)with

Bu3SnHa at 30 oC.

a, The samples were photolyzed under ambient light for 12 hr since the Rayonet lamps would cause the addition of radical Bu3Sn. to the double bond of the precursor. b, The ratios of reduced product to cyclized product were determined by integration of the CHF=C*F* resonance of **3e** (at  -160.12) versus the *t*-C-F resonance of **5e** ( -150.44) in the 19F NMR.

*k*H /*k*c5 = 12.5  0.3

*k*c5 = 2.2 ( 0.2) x 105 s-1

**Table 10.** Competition Data for the Reaction of 1,1,2-Trifluoro-6-bromo-1-hexene (**1f**)

with Bu3SnHa at 30 oC.

a, The samples were photolyzed under ambient light for 18 hr. b, The ratios of reduced product to cyclized product were determined by integration of the C*F*2 =CF resonance of **3f** (at  -125.84) versus the CF2H resonance of **5f** ( -131.50) in the 19F NMR.

*k*H /*k*c5 = 3.9  0.2.

*k*c5 = 6.9 ( 0.6) x 105 s-**1**

**Table 11.** Competition Data for the Reaction of 1,1,2,3,3,4,4-Heptafluoro-6-bromo-

1-hexene (**2g**) with Bu3SnHa at 30 oC.

a, The samples were photolyzed under ambient light for 12 hr. b, The ratios of reduced product to cyclized products were determined by integration of the 19F NMR CF2=C*F* resonance of **3g** (at  -188.13) versus the *t*-C-F resonance of **5g** ( -182.24).

*k*H /*k*c5 = 4.5  0.2

*k*c5 = 6.0 ( 0.5) x 105 s-1

**Table 12.** Competition Data for the Reaction of 6-bromo-perfluoro-1-hexene (**1h**) with

Et3SiHa at 30 oC.

a, The samples were photolyzed with Rayonet lamps for 4 hr. b, The ratios of reduced product to cyclized products were determined by integration of the 19F NMR CF2H resonance of **3h** (at  -136.97) versus the CF2H resonance of **5h** ( -135.48).

*k*H /*k*c5 = 1.60  0.02

*k*c5 = 4.7 ( 0.4) x 105 s-1

**Table 13.** Competition Data for the Reaction of 6-bromo-6,6-difluoro-1-hexene (**1i**) with

*n*-Bu3SnH at 30 oC.

| [RHFX] | [ *n*-Bu3SnH ] | [reduced] /[c5]a | % Yield |
| --- | --- | --- | --- |
| 0.054 | 0.673 | 1.53 | 88 |
| 0.054 | 0.807 | 1.91 | 100 |
| 0.054 | 0.942 | 2.28 | 89 |
| 0.054 | 1.08 | 2.57 | 94 |
| 0.054 | 1.21 | 2.93 | 95 |
| 0.054 | 1.35 | 3.29 | 92 |

a Ratios of reduced to cyclized products were determined by integration of the -CF2H resonance (at  -116.2) versus the sum of integrals for the diastereotopic -CF2- resonances (at  -100.3 and -107.8) in the 19F NMR.

*k*H / *k*c5 = 2.38  0.06

*k*c5 = 3.8 ( 0.7) x 106 s-**1**

**Table 14.** Competition Data for the Reaction of 6-bromo-5,5-difluoro-1-hexene (**1j**) with

*n*-Bu3SnH at 30 oC.

| [RHFX] | [ *n*-Bu3SnH ] | [reduced]/[c5]a | [reduced]/[c6]a | % Yield |
| --- | --- | --- | --- | --- |
| 0.053 | 0.286 | 2.64 | 24.3 | 98 |
| 0.053 | 0.343 | 3.40 | 30.9 | 100 |
| 0.053 | 0.400 | 4.03 | 37.8 | 100 |
| 0.053 | 0.457 | 4.71 | 48.2 | 99 |
| 0.053 | 0.514 | 5.44 | 54.4 | 98 |
| 0.053 | 0.572 | 6.26 | 61.1 | 98 |

a Ratios of reduced to cyclized products were determined by integration of the -CH2CF2CH3 resonance (at  -91.5) versus the sum of integrals for the diastereotopic -CF2- resonances (at  -88.9 and -90.4, for c5) and the -CF2- resonance (at  -95.8, for c6) in the 19F NMR.

*k*H / *k*c5 = 10.2  0.6

*k*c5 = 1.4 ( 0.5) x 106 s-1

*k*H / *k*c6 = 98  9

*k*c6 = 1.4 ( 0.5) x 105 s-1

**Table 15.** Competition Data for Reaction of 1-Bromo-1,1,2,2-tetrafluorohexane with

Styrene versus reduction with (TMS)3SiH at 30 oC.

| [RHFX] | [ Styrene ] | [TMS3SiH ] / [ Styrene ] | [reduced] /[adduct]a | % Yield |
| --- | --- | --- | --- | --- |
| 0.074 | 1.29 | 0.988 | 1.10 | 90 |
| 0.074 | 1.19 | 1.11 | 1.20 | 92 |
| 0.074 | 1.08 | 1.26 | 1.32 | 93 |
| 0.074 | 0.970 | 1.44 | 1.52 | 94 |
| 0.074 | 0.863 | 1.67 | 1.71 | 92 |
| 0.074 | 0.755 | 1.96 | 1.98 | 95 |

a Ratios of reduced to adduct products were determined by sum of integrals of the -CF2- and -CF2H resonances (at  -116.9 and -136.0, respectively) versus that of the two -CF2- resonances (at  -116.0 and -116.4, respectively) in the 19F NMR.

*k*H / *k*add = 1.06  0.04

*k*H (TMS3SiH) = 2.1 ( 0.1) x 107 M-1 s-1

**Table 16.** Competition Data for the Reaction of 6-bromo-5,5,6,6-tetrafluoro-1-hexene (**1k**) with

(TMS)3SiH at 30 oC.

| [RHFX] | [ TMS3SiH ] | [reduced]/[c5]a | [reduced]/[c6]a | % Yield |
| --- | --- | --- | --- | --- |
| 0.052 | 0.581 | 0.988 | 4.35 | 96 |
| 0.052 | 0.686 | 1.19 | 5.28 | 95 |
| 0.052 | 0.792 | 1.44 | 6.39 | 94 |
| 0.052 | 0.897 | 1.67 | 7.36 | 95 |
| 0.052 | 1.00 | 1.84 | 8.21 | 98 |
| 0.052 | 1.11 | 2.11 | 9.37 | 99 |

a Ratios of reduced to cyclized products were determined by the sum of integrals of the -CF2- and -CF2H resonances (at  -116.7 and -135.9, respectively) versus the sum of integrals for the diastereotopic -CF2- resonances (at  -109.9, -120.8, -126.0, and -132.9, for c5) and the -CF2- resonance (at  -119.6, for c6) in the 19F NMR.

*k*H / *k*c5 = 1.81  0.08

*k*c5 = 1.16 ( 0.07) x 107 s-1

*k*H / *k*c6 = 8.0  0.3

*k*c6 = 2.6 ( 0.2) x 106 s-1

**Table 17.** Competition Data for the Reaction of 4,4,5,5,6,6-Hexafluoro-6-iodo-

1-hexene (**1l**) with (TMS)3SiHa at 30 oC.

a The samples were photolyzed with Rayonet lamps for 20 min. b The ratios of reduced product to cyclized products were determined by integration of the 19F NMR CF2H resonance of **3l** (at  -137.89) versus a ring (1F) resonance of **5l** ( -120.97) and the (4F) ring resonance of **6l** (at  -117.53).

*k*H /*k*c5 = 1.14  0.01

*k*c5 = 4.5 ( 0.4) x 107 s-1

*k*H /*k*c6 = 9.1  0.2

*k*c6 = 5.6 ( 0.6) x 106 s-1

**Table 18.** Competition Data for the Reaction of 3,3,4,4,5,5,6,6-Octafluoro-6-iodo-

1-hexene (**1m**) with (TMS)3SiHa at 30 oC.

a The samples were photolyzed with Rayonet lamps for 4 hr.  b The ratios of reduced product to cyclized products were determined by integration of the 19F NMR CF2H resonance of **3m** (at  -137.05) versus a ring (2F) resonance of **5m** ( -134.05) and a (4F) ring resonance of **6m** (at  -118.19).

*k*H /*k*c5 = 4.5  0.2

*k*c5 = 1.13 ( 12) x 107 s-1

*k*H /*k*c6 = 13.0  0.6

*k*c6 = 3.9 ( 0.4) x 106 s-1
